# Supplementary material for: Estuarine bivalve metabolic response mediated by environmental drivers
Source: PeerJ. 2025 Nov 17;13:e20357. doi: 10.7717/peerj.20357 (PMC12633146; doi:10.7717/peerj.20357)
Supplement: Supplemental Information 2 — Raw data of the metabolites identified in Austrovenus across the seven sampling sites in Waihı¯ Estuary. [file peerj-13-20357-s002.xlsx]

## Sheet: Metabolites_for_R
ID	Class	Unique sample ID	Site	Rep	Cabamic acid (From old library)	Succinic acid	Fumaric acid	Nicotinic acid	Alanine	Glycine	2-Aminobutyric acid (From old library)	beta-Alanine	Valine	DL-3-Aminoisobutyric acid	Leucine	Isoleucine	2-Hydroxyglutaramic acid MCF1	2-Phosphoenolpyruvic acid	Proline	Malic acid peak 2	Threonine	Aspartic acid	Citric acid	2,4-Di-tert-butylphenol (derivatization artefact)	Pyroglutamic acid	16.7644 min N-(Carboxymethyl)-L-alanine	Asparagine	Myristic acid (C14_0)	Glutamic acid	Methionine	Glutathione	4-Hydroxyphenylacetic acid	Pentadecanoic acid (C15_0)	Phenylalanine	2-Aminoadipic acid	Palmitelaidic acid (C16_1n-9c)	10,13-dimethyltetradecanoic acid (C17_0) (From old library)	21.4162 min L-(-)-threo-3-Hydroxyaspartic acid	Margaric acid (C17_0) (split peak 3)	trans-Vaccenic acid	Stearic acid (C18_0)	gamma-Linolenic acid (C18_3n-6,9,12c)	Ornithine	Lysine	Arachidonic acid (C20_4n-6,9,12,15c)	DPA (C22_5n-3,6,9,12,15c)	Histidine	Tyrosine	DHA (C22_6n-3,6,9,12,15,18c)
1	Monitoring	Little Waihi Estuary 1.1	1	1	0.000272486	0.0767196	0.00112361	0.00123175	0.376499	0.337775	0.00578319	0.00270389	0.0257882	0.000711107	0.0246725	0.00854636	8.51976e-05	0.000114841	0.0385762	0.00313967	0.00413187	0.118349	0.000804789	0.00220009	0.0376158	0.00513148	0.00375399	0.000673423	0.0645478	0.00297727	0.00203777	3.69313e-05	0.000225757	0.0125939	0.00156416	0.000629125	0.0088629	0.000392158	0.000496291	0.0023352	0.00295026	0.000662928	0.00272635	0.0209389	0.000608223	0.00169229	0.00111608	0.0119252	0.00131206
2	Monitoring	Little Waihi Estuary 1.2	1	2	0.000285111	0.0663134	0.00119116	0.000998016	0.32455	0.301989	0.00426935	0.00204241	0.022943	0.000697232	0.0235283	0.00778273	8.85894e-05	0.000110436	0.0310835	0.00354168	0.00262809	0.0962722	0.00121071	0.00245419	0.0305375	0.00357336	0.00317864	0.000424209	0.0479665	0.00285943	0.00247414	2.98067e-05	0.000150055	0.0119033	0.0010774	0.000351559	0.00579863	0.000297567	0.000253809	0.00154916	0.00233766	0.000367289	0.00158735	0.0135831	0.000414939	0.000916076	0.000553037	0.00986954	0.000675744
3	Monitoring	Little Waihi Estuary 1.3	1	3	0.000318889	0.0707155	0.00112658	0.00119227	0.362073	0.329521	0.00541491	0.00247182	0.0235808	0.000659682	0.0230078	0.00765127	9.88656e-05	0.000143107	0.0383148	0.0034979	0.0034265	0.109381	0.00104241	0.00201789	0.034189	0.00480382	0.00349406	0.000776918	0.0548067	0.00289695	0.0017297	3.64365e-05	0.000212338	0.0122685	0.00149549	0.000662639	0.00812808	0.000225408	0.000370126	0.00215148	0.00257536	0.000608473	0.00203499	0.0163208	0.000629035	0.00142477	0.00089262	0.0110185	0.00111542
4	Monitoring	Little Waihi Estuary 1.4	1	4	0.000391388	0.09681	0.00138376	0.00105113	0.38308	0.31382	0.0085092	0.00190313	0.0286417	0.000616116	0.0288931	0.00994483	0.00010824	0.00020517	0.0296556	0.00454861	0.00409272	0.0998784	0.00148982	0.00193032	0.0289215	0.00569624	0.00354875	0.000564933	0.0876854	0.00340103	0.00265366	4.34785e-05	0.000199058	0.0137684	0.00389175	0.000449072	0.00822627	0.000874632	0.000465854	0.00192378	0.00324134	0.000353999	0.00187554	0.0224307	0.000551753	0.00121708	0.00155409	0.0134159	0.00115644
5	Monitoring	Little Waihi Estuary 1.5	1	5	0.000292692	0.0703641	0.00184654	0.00133993	0.368869	0.401618	0.00520002	0.00251037	0.0223515	0.00076289	0.0224434	0.00714333	0.000110401	0.000186631	0.0292745	0.00532709	0.00299775	0.126775	0.00149474	0.00268157	0.0354954	0.00687925	0.00285528	0.000390677	0.0672781	0.00341221	0.00271988	3.73585e-05	0.000145922	0.012079	0.000975155	0.000326723	0.00595747	0.000290481	0.000333287	0.00172982	0.00238051	0.000376194	0.00193828	0.0138114	0.000512908	0.00106613	0.000745799	0.011443	0.000965116
6	Monitoring	Little Waihi Estuary 2.1	2	1	0.00026108	0.0536749	0.000888702	0.00107461	0.303753	0.218807	0.00337297	0.00169212	0.0152038	0.000497849	0.0156248	0.00522226	7.86849e-05	0.000119546	0.0162258	0.00287527	0.00204406	0.0968734	0.00174368	0.00232695	0.0286606	0.00704938	0.00196598	0.000605846	0.0462847	0.00227434	0.00167149	3.51437e-05	0.000156443	0.00789294	0.00155583	0.000433935	0.00531686	0.00130324	0.000171873	0.00121342	0.00200367	0.000107217	0.00107249	0.0100387	0.000443839	0.000901069	0.000637956	0.00703107	0.000712536
7	Monitoring	Little Waihi Estuary 2.2	2	2	0.000267533	0.0689141	0.000734182	0.00121964	0.354032	0.228345	0.00369848	0.00176313	0.0151645	0.000527959	0.0151294	0.00500534	7.54267e-05	0.000115276	0.0180169	0.00230524	0.00205339	0.0966256	0.00110327	0.00240805	0.0274438	0.00391257	0.00237836	0.000376706	0.0526741	0.00218732	0.00244213	3.20894e-05	0.00011621	0.00696401	0.000830804	0.000272876	0.00405697	0.00045729	0.000135959	0.00107347	0.00184011	8.81636e-05	0.00101886	0.0101749	0.000297956	0.000688373	0.000712941	0.00648216	0.000601363
8	Monitoring	Little Waihi Estuary 2.3	2	3	0.000247091	0.0591093	0.000898886	0.00100233	0.233411	0.172263	0.00263954	0.0017821	0.0166949	0.000672137	0.0154618	0.00528603	5.78314e-05	7.32351e-05	0.017895	0.00236307	0.00219873	0.0676255	0.000644353	0.00164341	0.0214439	0.00361922	0.0021781	0.000391609	0.0490406	0.00182875	0.00170469	0.000101743	9.96537e-05	0.00772849	0.00147054	0.000319086	0.00353096	0.000258854	0.000125197	0.000944504	0.00144198	8.07248e-05	0.000725481	0.00772794	0.000332908	0.00070638	0.000707775	0.00667628	0.000647576
9	Monitoring	Little Waihi Estuary 2.4	2	4	0.000290108	0.0504134	0.000781995	0.00104405	0.28357	0.278391	0.00337698	0.00130805	0.020981	0.000441414	0.0204827	0.00697665	7.56996e-05	8.78244e-05	0.0200998	0.00303976	0.0023506	0.0834485	0.00111091	0.00211042	0.0305299	0.00468381	0.0024607	0.000370485	0.0453534	0.00275812	0.00212789	0.000124674	0.000120375	0.00982584	0.00272673	0.000264805	0.00432103	0.00038173	0.000178168	0.00120869	0.00191804	8.66534e-05	0.000812525	0.00886446	0.000404029	0.000841917	0.000909871	0.00746508	0.000867926
10	Monitoring	Little Waihi Estuary 2.5	2	5	0.000232774	0.0750464	0.000879184	0.001208	0.24425	0.23294	0.00389148	0.00199703	0.015275	0.000851857	0.0148907	0.00511351	0.000307025	9.36654e-05	0.10318	0.00209715	0.00208358	0.0736028	0.00242674	0.00258104	0.0275478	0.00444581	0.00185239	0.000396366	0.0402263	0.00195331	0.00210502	2.65894e-05	0.000137602	0.00668787	0.000776527	0.000298118	0.00428876	0.0003436	0.000157252	0.00117339	0.00194509	8.68794e-05	0.00555663	0.0105268	0.000377464	0.000801592	0.000909251	0.00608015	0.000779537
11	Monitoring	Little Waihi Estuary 3.1	3	1	0.000280903	0.0519011	0.000764377	0.000986018	0.307548	0.384344	0.00390308	0.00192726	0.0177984	0.000733427	0.0181239	0.00614375	7.2177e-05	0.000128084	0.0194537	0.00210052	0.00202997	0.0863537	0.000701983	0.0020248	0.0284447	0.00505078	0.00254895	0.00026428	0.0514182	0.00278097	0.00249288	4.98573e-05	0.000115793	0.00821447	0.00324155	0.000182994	0.00375002	0.000502659	0.000209627	0.00104336	0.00197694	9.05185e-05	0.00120727	0.00894458	0.00037523	0.000547171	0.000719514	0.00685816	0.00046359
12	Monitoring	Little Waihi Estuary 3.2	3	2	0.00024848	0.0548307	0.000919293	0.000955483	0.348761	0.353823	0.00379382	0.00167909	0.0187319	0.000691906	0.0195542	0.00675195	9.50123e-05	0.000144859	0.0202714	0.0023131	0.00235817	0.112509	0.000741092	0.00248183	0.0280443	0.00613486	0.00332492	0.000441616	0.0456384	0.00312598	0.00216514	2.26707e-05	0.000171223	0.00983521	0.00228767	0.000374577	0.0062328	0.000352718	0.000347045	0.00140145	0.00260151	0.000127136	0.00253505	0.014614	0.000416495	0.000845927	0.000776898	0.00846725	0.00057926
13	Monitoring	Little Waihi Estuary 3.3	3	3	0.000269846	0.0527304	0.00127319	0.00103144	0.37919	0.27647	0.00422089	0.00153486	0.0212573	0.000568741	0.0216465	0.00761161	9.62638e-05	0.000204405	0.0239625	0.0032777	0.00282227	0.115295	0.000920819	0.00193935	0.0290317	0.00551348	0.0038569	0.000484534	0.0496161	0.00358046	0.00177824	5.63983e-05	0.000159839	0.0121462	0.000923765	0.0005593	0.00541685	0.000202983	0.000287351	0.00166816	0.00233371	0.000202842	0.00193669	0.0141448	0.000552361	0.00115454	0.000922117	0.0109089	0.000953167
14	Monitoring	Little Waihi Estuary 3.4	3	4	0.000324829	0.052775	0.00116941	0.00111126	0.314445	0.298271	0.0042233	0.00182783	0.0217759	0.000624944	0.021771	0.00746551	7.81311e-05	0.000169025	0.0237277	0.0030595	0.00261873	0.114898	0.000941815	0.00224797	0.0302449	0.00578143	0.0032713	0.000496086	0.0483702	0.00341104	0.00220422	4.57164e-05	0.00015871	0.0117847	0.000977629	0.000543901	0.0054005	0.000262285	0.000335869	0.00170025	0.00285371	0.00018276	0.00131374	0.011173	0.000554137	0.00114808	0.000644742	0.0103807	0.000755561
15	Monitoring	Little Waihi Estuary 3.5	3	5	0.000330713	0.0534439	0.0014649	0.00107135	0.359307	0.26429	0.00454824	0.00176729	0.0212244	0.000692505	0.0209695	0.00745762	8.37967e-05	0.000218578	0.021455	0.00397606	0.00269786	0.0995238	0.00123171	0.00210488	0.0294668	0.00802744	0.00341068	0.000474183	0.052772	0.0029846	0.00172956	6.23275e-05	0.000169493	0.0111536	0.00198833	0.000515629	0.00489331	0.000632421	0.000275772	0.00141633	0.00221784	0.000158827	0.00138486	0.0106625	0.000496933	0.00105867	0.000735243	0.00983749	0.000820311
16	Monitoring	Little Waihi Estuary 4.1	4	1	0.00030741	0.0713044	0.00113703	0.00133337	0.406301	0.57984	0.00492767	0.0029253	0.0147222	0.000942206	0.0125071	0.00454737	6.02448e-05	0.000169198	0.0199708	0.00264961	0.0023432	0.0980135	0.00194719	0.00195442	0.0306928	0.00396145	0.00287962	0.000313	0.0556155	0.00225384	0.00186616	2.84947e-05	0.00015889	0.00571451	0.000791964	0.000341477	0.00485001	0.000663927	0.000398357	0.00160718	0.00259386	0.000189575	0.00251361	0.0135836	0.000476179	0.00127985	0.000743048	0.00616433	0.000940042
17	Monitoring	Little Waihi Estuary 4.2	4	2	0.00031738	0.0617253	0.00125927	0.00146183	0.370576	0.415398	0.00695128	0.00264354	0.0188676	0.00112889	0.0168689	0.00600979	7.24701e-05	0.000152737	0.0247955	0.00315816	0.00284612	0.109766	0.00122594	0.0024713	0.0336877	0.00863007	0.00265591	0.000426906	0.0527301	0.00215006	0.00243394	3.06769e-05	0.000186636	0.00691568	0.0019377	0.000458015	0.0043442	0.000225097	0.000274573	0.00172253	0.00247127	0.000191084	0.00337285	0.0120948	0.000534188	0.00116838	0.000409541	0.00663947	0.000754099
18	Monitoring	Little Waihi Estuary 4.3	4	3	0.000442228	0.0483138	0.00121649	0.00133119	0.357581	0.309595	0.00597624	0.00556872	0.0190421	0.00139547	0.0166927	0.00595451	0.000103304	0.000125728	0.0221285	0.00323914	0.0035993	0.119242	0.00168871	0.00238915	0.0279346	0.00717354	0.00271729	0.000492845	0.0427173	0.00168133	0.00226363	7.50041e-05	0.000192772	0.00713284	0.00139942	0.000559238	0.00509797	0.00116817	0.000286229	0.00185866	0.00234452	0.000281206	0.00192974	0.0077931	0.000558175	0.00137286	0.000594739	0.00765033	0.000857502
19	Monitoring	Little Waihi Estuary 4.4	4	4	0.000333526	0.0640336	0.00115235	0.00124458	0.412302	0.35712	0.0053284	0.00285248	0.0190377	0.00117487	0.0172573	0.00605095	9.30821e-05	0.000129609	0.0282046	0.00300304	0.00263299	0.0830281	0.00218489	0.00242633	0.0320911	0.0126284	0.00261544	0.000473944	0.0527508	0.00206706	0.00237314	7.78368e-05	0.000192459	0.00813107	0.00158676	0.000545236	0.00502176	0.000392701	0.000271742	0.00168844	0.0022906	0.000285364	0.00315617	0.0115338	0.000418292	0.000960614	0.000501817	0.00817703	0.000573221
20	Monitoring	Little Waihi Estuary 4.5	4	5	0.000265309	0.0390098	0.00108649	0.00100923	0.269294	0.237592	0.00445232	0.00208408	0.014149	0.0010052	0.0132414	0.00443673	8.36292e-05	0.000131443	0.0165191	0.00267045	0.0018698	0.0646663	0.00135801	0.00278294	0.0224733	0.00866476	0.00191777	0.000513263	0.0395264	0.00137949	0.00192407	7.97667e-05	0.00019135	0.00560283	0.00107074	0.000535043	0.00448952	0.000222366	0.000258834	0.00155821	0.00201499	0.000200301	0.00211729	0.00904615	0.000399222	0.00106427	0.000402723	0.00609724	0.000702741
21	Monitoring	Little Waihi Estuary 5.1	5	1	0.000493209	0.0406474	0.00246924	0.00050085	0.30428	0.177029	0.00256261	0.00209954	0.0216895	0.000387372	0.0162059	0.00722971	0.000616921	9.48799e-06	0.0432114	0.00534211	0.00284002	0.0248804	0.00107895	0.00211295	0.0119479	0.0169781	0.00285718	0.000443158	0.0212626	0.00085646	0.000979422	0.00082206	0.000203526	0.00607052	0.00130414	0.000739045	0.00536679	0.000137226	0.000401531	0.00244506	0.00268335	0.00112265	0.00139563	0.00568266	0.000628951	0.0035104	0.000287507	0.00563442	0.00312556
22	Monitoring	Little Waihi Estuary 5.2	5	2	0.000521578	0.0557401	0.00214736	0.000582957	0.345931	0.226669	0.0038892	0.00235105	0.0230766	0.000502974	0.018191	0.00753302	0.00064218	1.70706e-05	0.0462808	0.0046755	0.00293374	0.0220405	0.0013151	0.00262964	0.0155178	0.0260552	0.00334992	0.000355616	0.030991	0.00128179	0.00116116	0.000586791	0.000217127	0.00795625	0.00138691	0.000876307	0.00549614	0.000162863	0.000393067	0.0027529	0.00261201	0.00139793	0.00179931	0.0109356	0.000818878	0.00415909	0.000358469	0.00850292	0.00364918
23	Monitoring	Little Waihi Estuary 5.3	5	3	0.000497662	0.0593871	0.00244266	0.000611236	0.377648	0.26362	0.00498406	0.0025968	0.0261663	0.000681283	0.0212031	0.008676	0.00081828	2.18e-05	0.0519753	0.00647416	0.00360769	0.0227624	0.0015676	0.00275937	0.0192036	0.0210099	0.00372417	0.000338282	0.0305806	0.0015937	0.00128391	0.000341315	0.000173382	0.00931039	0.00100832	0.000775698	0.00434559	0.000301676	0.000286887	0.00225572	0.00233176	0.0011265	0.00310271	0.0124559	0.00058585	0.00308111	0.000490734	0.00967373	0.00296197
24	Monitoring	Little Waihi Estuary 5.4	5	4	0.000577366	0.0602629	0.00257269	0.000650711	0.360284	0.22118	0.00333667	0.00230697	0.0234495	0.000513831	0.0181432	0.00774142	0.000735973	1.96955e-05	0.0457944	0.00817653	0.00347968	0.0240172	0.00153696	0.00268999	0.0152321	0.0228991	0.00342364	0.000503344	0.034578	0.00115439	0.00162612	0.000359477	0.00026434	0.00797803	0.00168007	0.000856344	0.00725521	0.000220865	0.000635769	0.00286515	0.00329332	0.00118084	0.00235242	0.00833107	0.000705729	0.00346165	0.000439944	0.00829731	0.00329779
25	Monitoring	Little Waihi Estuary 5.5	5	5	0.000425665	0.060416	0.0026486	0.000526399	0.324832	0.282388	0.00497349	0.00186898	0.0230063	0.000694125	0.0193502	0.00788846	0.000659559	1.71602e-05	0.0460477	0.00677478	0.00271985	0.0201982	0.00182825	0.00236629	0.0203279	0.0281698	0.00393401	0.000289357	0.0361854	0.00131257	0.00135532	0.000268486	0.000179655	0.0084481	0.000831601	0.000692959	0.00427417	0.000154115	0.000325389	0.00235354	0.00209915	0.00126378	0.00228285	0.010744	0.00069659	0.00358532	0.000565271	0.00930997	0.00320127
26	Monitoring	Little Waihi Estuary 7.1	7	1	0.000416868	0.0410527	0.00162318	0.000344777	0.147853	0.0463617	0.00121712	0.00121028	0.0161283	0.000529026	0.0119656	0.00613845	0.000130606	1.16105e-05	0.0151858	0.0042136	0.00159855	0.0162896	0.000924719	0.00200988	0.0042512	0.00382578	0.00171474	0.00027714	0.012215	0.000516604	0.000530396	0.00100889	0.000136311	0.00394791	0.00168849	0.000612841	0.0034876	0.000420292	0.000291067	0.00189699	0.00230726	0.00056774	0.000218122	0.00137003	0.000951336	0.00283369	3.26354e-05	0.00335592	0.0033435
27	Monitoring	Little Waihi Estuary 7.2	7	2	0.000372285	0.0577366	0.00204852	0.000422037	0.155046	0.0558145	0.0013416	0.00168515	0.0110358	0.000702386	0.00936156	0.00375652	0.000559371	2.18415e-05	0.0174683	0.00575044	0.00173481	0.0184508	0.00176305	0.00143041	0.0110964	0.00747626	0.00220741	0.00030279	0.0324995	0.000621382	0.000879379	0.000279518	0.000202084	0.0043529	0.00261395	0.00045445	0.00607528	0.000572699	0.000631476	0.00216708	0.00329828	0.000792046	0.000822045	0.00732479	0.000942143	0.00261538	0.000432148	0.00409138	0.0033196
28	Monitoring	Little Waihi Estuary 7.3	7	3	0.000355639	0.063827	0.00130438	0.000310491	0.161482	0.0463963	0.00126836	0.000835588	0.0143063	0.00039674	0.00839107	0.00499564	0.000166165	1.22254e-05	0.0154332	0.0033094	0.00209209	0.0132209	0.000794288	0.00226222	0.00629634	0.0191634	0.00146683	0.000142488	0.0158351	0.000379128	0.000573583	0.00189966	8.32359e-05	0.00280787	0.00113068	0.000146368	0.00272688	0.000207621	0.000195457	0.00102588	0.00186377	0.000237162	0.00020464	0.00100282	0.000349697	0.000532055	8.02631e-05	0.00253781	0.000929559
29	Monitoring	Little Waihi Estuary 7.4	7	4	0.000371756	0.0487241	0.00159269	0.000437243	0.3025	0.0653996	0.00392755	0.0016629	0.0209499	0.000407394	0.0165857	0.00765747	0.00024549	1.09329e-05	0.0289175	0.00474972	0.00201324	0.0182882	0.00100225	0.00241533	0.00933603	0.00696987	0.00285372	0.000456004	0.0239693	0.000985438	0.00105504	0.000602272	0.000207588	0.00685084	0.00566582	0.001013	0.00402499	0.000506609	0.000220618	0.00283659	0.00213461	0.00162219	0.00117925	0.00745512	0.00110293	0.00521643	0.000296136	0.00670941	0.00278974
30	Monitoring	Little Waihi Estuary 7.5	7	5	0.000252947	0.0448105	0.00148953	0.000202506	0.0891838	0.0345005	0.00100484	0.000998781	0.00919406	0.000294515	0.00653076	0.00331556	0.000134275	1.12132e-05	0.0113981	0.00361194	0.00107177	0.0190527	0.000517229	0.00182709	0.00474298	0.00297238	0.00126806	0.000283439	0.0157629	0.000243408	0.000434767	0.000462419	0.000157021	0.00242316	0.000978501	0.000482149	0.00384791	0.000308524	0.000346029	0.00181652	0.0026823	0.000692247	0.000523112	0.00276014	0.00099546	0.00318629	9.76173e-05	0.00201499	0.00357338
31	Monitoring	Little Waihi Estuary 8.1	8	1	0.000430888	0.0649988	0.000996269	0.00116585	0.321648	0.202844	0.00398266	0.00169674	0.0265948	0.000658973	0.0259904	0.00919872	9.13785e-05	0.000136432	0.0314167	0.00302816	0.0035585	0.0992942	0.0012921	0.00202955	0.0282431	0.00344887	0.00443438	0.000996831	0.0531226	0.00325636	0.00170366	0.000133936	0.000218051	0.0135916	0.00122387	0.000960277	0.00807104	0.000716536	0.000351091	0.00231885	0.00289371	0.000746301	0.00158852	0.0148719	0.00042536	0.00167001	0.000746719	0.0120347	0.00122914
32	Monitoring	Little Waihi Estuary 8.2	8	2	0.000415634	0.0686475	0.00175917	0.00136698	0.4547	0.299977	0.00661039	0.00273205	0.0324697	0.00101749	0.0300909	0.011016	0.000148131	0.000197068	0.0384644	0.00392772	0.0045431	0.121818	0.00090013	0.0020428	0.0319872	0.00383915	0.00433613	0.000990103	0.0576736	0.00282455	0.00212643	0.000204592	0.000210886	0.0151321	0.00182995	0.00108062	0.00765868	0.000281409	0.000323658	0.0028005	0.00269622	0.000620519	0.00228941	0.0125619	0.000520904	0.00177758	0.00108708	0.014514	0.00174579
33	Monitoring	Little Waihi Estuary 8.3	8	3	0.000346245	0.0700968	0.00100055	0.00132759	0.335024	0.233665	0.00389296	0.0021739	0.02166	0.000782857	0.0216133	0.00743093	0.000104488	0.000150356	0.0250269	0.00306322	0.00306629	0.108443	0.000902422	0.00204452	0.0262033	0.00376138	0.00328579	0.00063337	0.0553238	0.00280683	0.0027542	6.35596e-05	0.00015493	0.01031	0.0010992	0.000681776	0.00543887	0.000532034	0.000214064	0.00197861	0.00243087	0.000470749	0.00144335	0.0110572	0.000417549	0.00133186	0.000797153	0.00901747	0.00102884
34	Monitoring	Little Waihi Estuary 8.4	8	4	0.000451136	0.0611438	0.00108796	0.00118407	0.317738	0.207204	0.00408774	0.00191939	0.0305366	0.000648572	0.0305394	0.010748	9.62125e-05	0.000166904	0.0320208	0.00352182	0.00353156	0.103705	0.000760371	0.0020205	0.024144	0.00314497	0.00443119	0.0010883	0.0591523	0.00333334	0.00224978	0.000128598	0.00028372	0.0163071	0.00243534	0.000978174	0.0109922	0.000649186	0.000566101	0.00296912	0.0042305	0.000754609	0.00162736	0.0149313	0.000595235	0.00201484	0.00103968	0.0144442	0.00179341
35	Monitoring	Little Waihi Estuary 8.5	8	5	0.000223601	0.0404485	0.000801522	0.00072274	0.191624	0.217571	0.0029487	0.000841915	0.0155852	0.000362768	0.0161411	0.00553516	8.01967e-05	0.000142341	0.0153732	0.00212116	0.00196353	0.0727165	0.000806992	0.00188669	0.0208645	0.00194846	0.0027532	0.000262597	0.0362835	0.00250579	0.00124966	3.4059e-05	8.31331e-05	0.00790305	0.000822977	0.000281036	0.00514808	0.00020352	0.000172278	0.00447174	0.00225767	0.000265275	0.000957881	0.00729162	0.000270226	0.000597898	0.000588589	0.00690507	0.000584682
[truncated: 2 more columns]
